# Supplementary material for: Association Between Hyperoxia, Supplemental Oxygen, and Mortality in Critically Injured Patients
Source: PubMed Central journal article supplement — Crit Care Explor. 2021 May 14;3(5):e0418. doi: 10.1097/CCE.0000000000000418 (PMC8133168; doi:10.1097/cce.0000000000000418), 2021-05-14
Supplement: cc9-3-e0418-s001.pdf [file cc9-3-e0418-s001.pdf]

**Supplemental Table 1. Elixhauser comorbidities included in the analysis.**

| <b>Variable Name</b>        | <b>Description</b>                                   |
|-----------------------------|------------------------------------------------------|
| CHF                         | Congestive Heart Failure                             |
| Valve                       | Valvular Disorders                                   |
| PULMCIRC                    | Pulmonary Circulation Disorders                      |
| PERIVASC                    | Peripheral Vascular Disease                          |
| HTN_C<br>(using HTN, HTNCX) | Hypertension (combine uncomplicated and complicated) |
| PARA                        | Paralysis                                            |
| NEURO                       | Other neurologic disorders                           |
| CHRNUNG                     | Chronic Pulmonary Disease                            |
| DM                          | Diabetes without chronic complications               |
| DMCX                        | Diabetes with chronic complications                  |
| HYPOTHY                     | Hypothyroidism                                       |
| RENLFAIL                    | Renal Failure                                        |
| LIVER                       | Liver Disease                                        |
| ULCER                       | Chronic Peptic Ulcer Disease                         |
| AIDS                        | HIV and AIDS (Acquired immune deficiency syndrome)   |
| LYMPH                       | Lymphoma                                             |
| METS                        | Metastatic Cancer                                    |
| TUMOR                       | Solid tumor without metastasis                       |
| ARTH                        | Rheumatoid arthritis / collagen vascular diseases    |
| COAG                        | Coagulation deficiency                               |
| OBESE                       | Obesity                                              |
| WGHTLOSS                    | Weight Loss                                          |
| LYTES                       | Fluid and Electrolyte Disorders                      |
| BLDLOSS                     | Blood Loss Anemia                                    |
| ANEMDEF                     | Deficiency Anemias                                   |
| ALCOHOL                     | Alcohol Abuse                                        |
| DRUG                        | Drug Abuse                                           |
| PSYCH                       | Psychoses                                            |
| DEPRESS                     | Depression                                           |
