# Supplementary material for: Association Between Hyperoxia, Supplemental Oxygen, and Mortality in Critically Injured Patients
Source: PubMed Central journal article supplement — Crit Care Explor. 2021 May 14;3(5):e0418. doi: 10.1097/CCE.0000000000000418 (PMC8133168; doi:10.1097/cce.0000000000000418), 2021-05-14
Supplement: cc9-3-e0418-s003.pdf [file cc9-3-e0418-s003.pdf]

**Risk Score**

|                        | <b>FiO<sub>2</sub> 21%</b> | <b>30%</b>            | <b>40%</b>            | <b>50%</b>            | <b>60%</b>             | <b>80%</b>              | <b>100%</b>              |
|------------------------|----------------------------|-----------------------|-----------------------|-----------------------|------------------------|-------------------------|--------------------------|
| <b>SpO<sub>2</sub></b> |                            |                       |                       |                       |                        |                         |                          |
| 88                     | 1.788 (1.250 - 2.558)      | 2.659 (1.959 - 3.611) | 3.968 (2.791 - 5.641) | 5.673 (3.735 - 8.614) | 7.769 (4.897 - 12.324) | 12.813 (7.964 - 20.614) | 17.803 (10.109 - 31.354) |
| 90                     | 1.218 (0.868 - 1.708)      | 1.938 (1.456 - 2.580) | 3.078 (2.225 - 4.259) | 4.623 (3.145 - 6.795) | 6.561 (4.277 - 10.064) | 11.165 (7.109 - 17.534) | 15.168 (8.800 - 26.144)  |
| 92                     | 0.819 (0.591 - 1.133)      | 1.398 (1.068 - 1.831) | 2.372 (1.754 - 3.206) | 3.749 (2.619 - 5.365) | 5.523 (3.698 - 8.246)  | 9.704 (6.294 - 14.962)  | 12.868 (7.565 - 21.886)  |
| 94                     | 0.543 (0.393 - 0.750)      | 0.999 (0.772 - 1.293) | 1.814 (1.365 - 2.411) | 3.025 (2.152 - 4.253) | 4.633 (3.154 - 6.805)  | 8.414 (5.513 - 12.841)  | 10.869 (6.403 - 18.451)  |
| 96                     | 0.356 (0.256 - 0.495)      | 0.707 (0.549 - 0.910) | 1.378 (1.046 - 1.817) | 2.430 (1.737 - 3.400) | 3.873 (2.642 - 5.678)  | 7.277 (4.766 - 11.112)  | 9.142 (5.321 - 15.707)   |
| 98                     | 0.230 (0.162 - 0.327)      | 0.495 (0.384 - 0.640) | 1.040 (0.786 - 1.375) | 1.942 (1.373 - 2.747) | 3.227 (2.169 - 4.802)  | 6.279 (4.058 - 9.715)   | 7.656 (4.334 - 13.526)   |
| 100                    | 0.147 (0.100 - 0.216)      | 0.344 (0.263 - 0.449) | 0.779 (0.580 - 1.047) | 1.545 (1.063 - 2.246) | 2.680 (1.743 - 4.121)  | 5.404 (3.400 - 8.588)   | 6.384 (3.457 - 11.789)   |
