# Supplementary material for: Association Between Hyperoxia, Supplemental Oxygen, and Mortality in Critically Injured Patients
Source: PubMed Central journal article supplement — Crit Care Explor. 2021 May 14;3(5):e0418. doi: 10.1097/CCE.0000000000000418 (PMC8133168; doi:10.1097/cce.0000000000000418), 2021-05-14
Supplement: cc9-3-e0418-s004.pdf [file cc9-3-e0418-s004.pdf]

|                  |                       | Risk Score            |                       |                         |                          |                          |                          |
|------------------|-----------------------|-----------------------|-----------------------|-------------------------|--------------------------|--------------------------|--------------------------|
| FiO <sub>2</sub> | 21%                   | 30%                   | 40%                   | 50%                     | 60%                      | 80%                      | 100%                     |
| SpO <sub>2</sub> |                       |                       |                       |                         |                          |                          |                          |
| 88               | 1.826 (1.466 - 2.273) | 3.334 (2.827 - 3.933) | 6.095 (4.783 - 7.768) | 10.394 (7.546 - 14.318) | 16.536 (11.527 - 23.720) | 33.976 (24.114 - 47.872) | 52.875 (34.943 - 80.009) |
| 90               | 1.191 (0.985 - 1.439) | 2.354 (2.069 - 2.679) | 4.620 (3.772 - 5.658) | 8.304 (6.295 - 10.955)  | 13.673 (9.957 - 18.777)  | 28.492 (20.827 - 38.977) | 41.799 (28.048 - 62.293) |
| 92               | 0.765 (0.646 - 0.906) | 1.645 (1.500 - 1.804) | 3.478 (2.950 - 4.100) | 6.606 (5.203 - 8.388)   | 11.271 (8.515 - 14.919)  | 23.785 (17.772 - 31.834) | 32.686 (21.977 - 48.613) |
| 94               | 0.484 (0.410 - 0.572) | 1.137 (1.075 - 1.204) | 2.601 (2.278 - 2.970) | 5.232 (4.234 - 6.467)   | 9.262 (7.164 - 11.974)   | 19.767 (14.916 - 26.196) | 25.284 (16.755 - 38.155) |
| 96               | 0.302 (0.251 - 0.363) | 0.778 (0.751 - 0.807) | 1.932 (1.720 - 2.170) | 4.126 (3.364 - 5.062)   | 7.587 (5.885 - 9.781)    | 16.354 (12.265 - 21.805) | 19.346 (12.409 - 30.163) |
| 98               | 0.186 (0.149 - 0.231) | 0.527 (0.497 - 0.559) | 1.425 (1.257 - 1.616) | 3.240 (2.595 - 4.046)   | 6.195 (4.700 - 8.166)    | 13.469 (9.864 - 18.392)  | 14.643 (8.933 - 24.004)  |
| 100              | 0.112 (0.086 - 0.147) | 0.353 (0.320 - 0.390) | 1.044 (0.891 - 1.225) | 2.533 (1.948 - 3.295)   | 5.043 (3.657 - 6.955)    | 11.043 (7.767 - 15.701)  | 10.964 (6.262 - 19.195)  |
