# Supplementary figures and images for: Association Between Hyperoxia, Supplemental Oxygen, and Mortality in Critically Injured Patients
Source: PubMed Central journal article supplement — Crit Care Explor. 2021 May 14;3(5):e0418. doi: 10.1097/CCE.0000000000000418 (PMC8133168; doi:10.1097/cce.0000000000000418), 2021-05-14

**SpO2**  
Linear vs Non-Linear

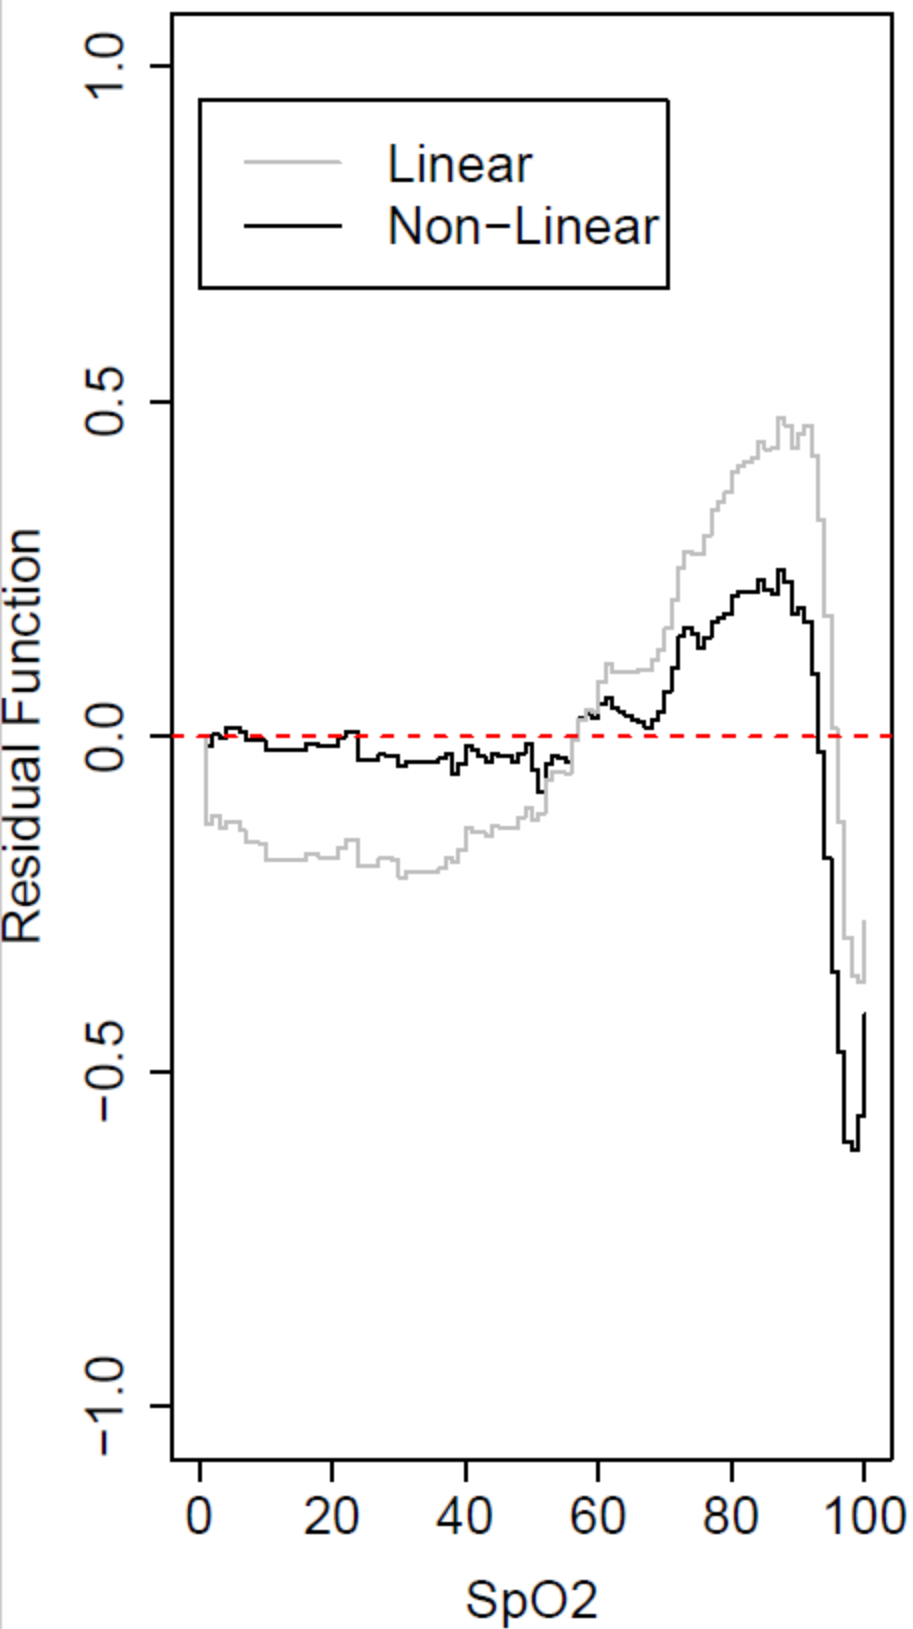

**FiO2**  
Linear vs Non-Linear

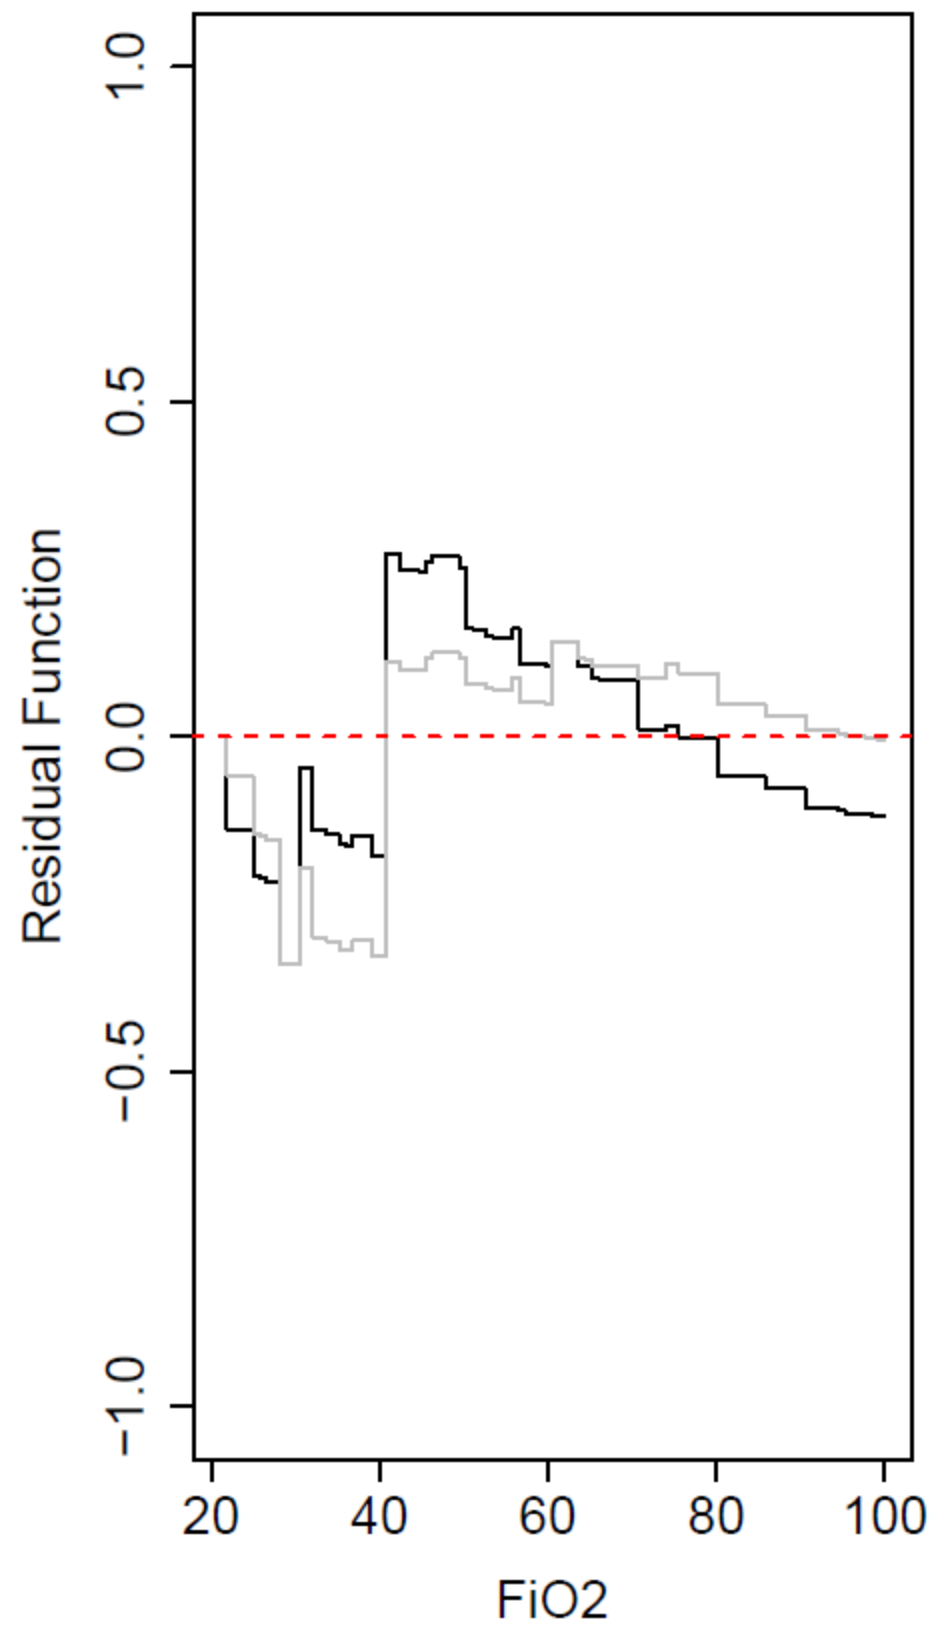

**Interaction**  
Linear vs Non-Linear

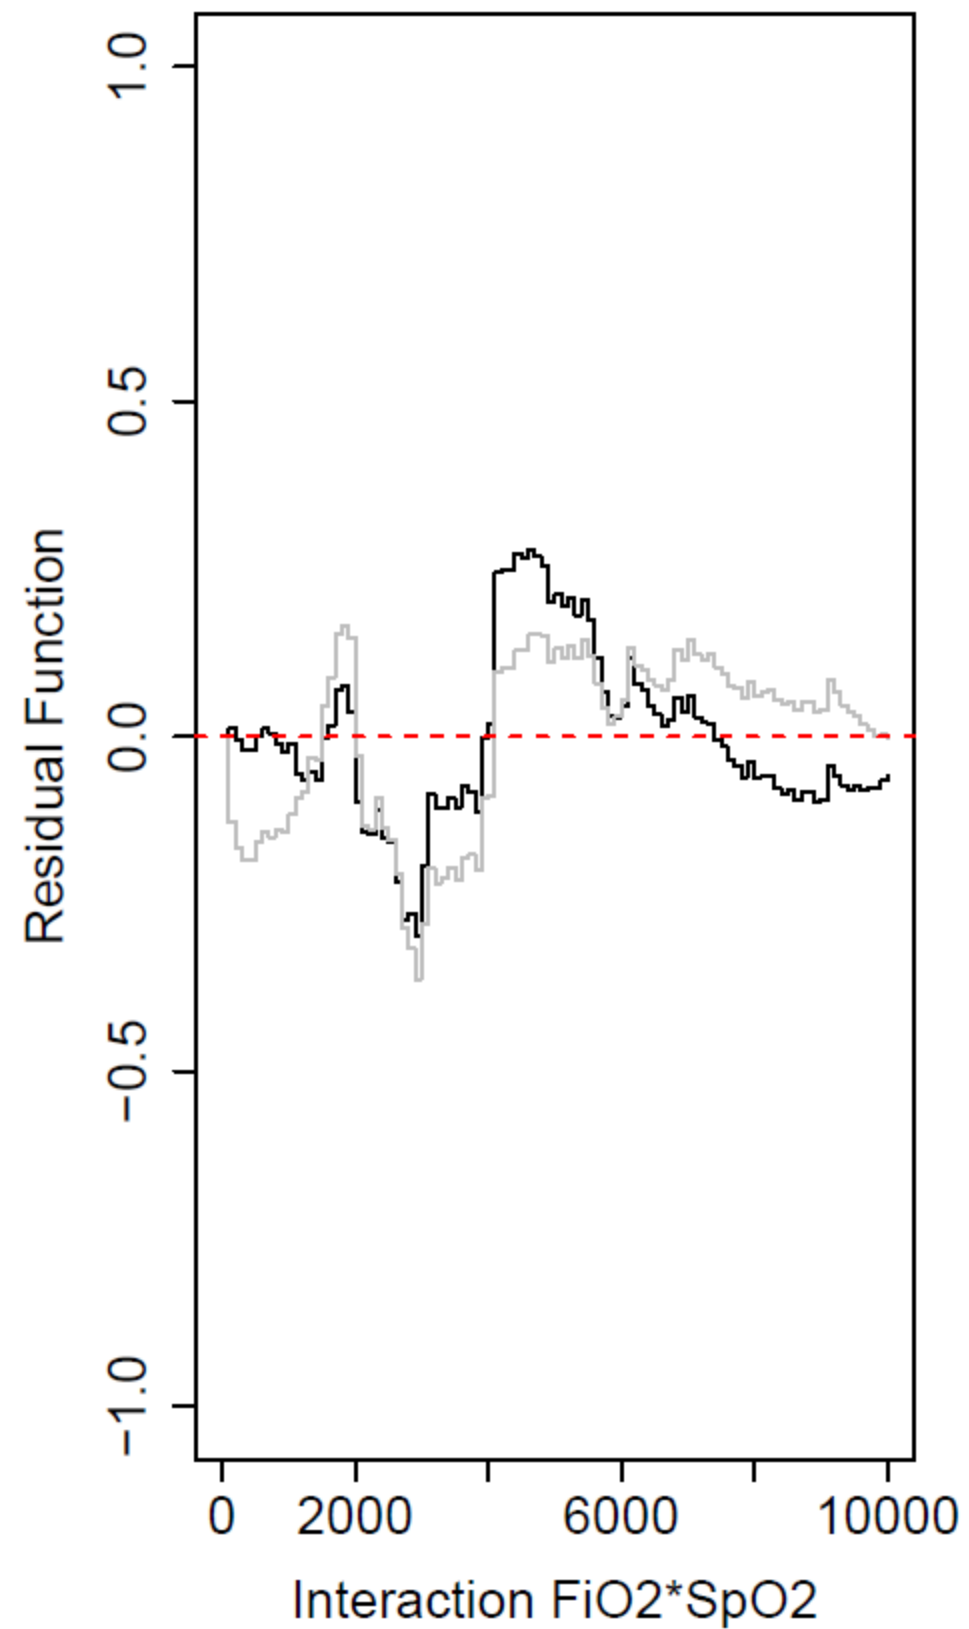

Supplement: cc9-3-e0418-s002.pdf [file cc9-3-e0418-s002.pdf]
